# Supplementary material for: Disulphide crosslinked star block copolypeptide hydrogels: influence of block sequence order on hydrogel properties
Source: Royal Society of Chemistry journal article supplement (doi:10.1039/c8py00741a), 2018-01-01
Supplement: c8py00741a2.pdf [file c8py00741a2.pdf]

Supporting information

**Disulphide Crosslinked Star Block Copolypeptide Hydrogels: Influence of Block Sequence Order on Hydrogel Properties**

Robert Murphy,<sup>a</sup> Marc in het Panhuis,<sup>b</sup> Sally-Ann Cryan,<sup>c,d,e,f</sup> and Andreas Heise<sup>\*a,f</sup>

<sup>a</sup> Department of Chemistry, Royal College of Surgeons in Ireland, Dublin 2, Ireland. Email: andreasheise@rcsi.ie

<sup>b</sup> Soft Materials Group, School of Chemistry, and Australian Research Council Centre of Excellence for Electromaterials Science, University of Wollongong, Wollongong, NSW 2522, Australia.

<sup>c</sup> Drug Delivery & Advanced Materials Team, School of Pharmacy, RCSI, Dublin, Ireland.

<sup>d</sup> Tissue Engineering Research Group, Department of Anatomy, RCSI, Dublin, Ireland.

<sup>e</sup> Trinity Centre for Bioengineering, Trinity College Dublin (TCD), Dublin, Ireland.

<sup>f</sup> Centre for Research in Medical Devices (CURAM), RCSI, Dublin and National University of Ireland, Galway, Ireland.

**Table S1.** Molecular weight and polydispersity of polypeptides.

| polymer                                         | $M_n^{\text{SEC}}$ | $M_n^{\text{theor.}}$ | dispersity<br>$\mathcal{D}^{\text{SEC}}$ |
|-------------------------------------------------|--------------------|-----------------------|------------------------------------------|
| <b>32-PZLL<sub>40</sub>-b-OBLC<sub>5</sub></b>  | 321 kDa            | 366 kDa               | 1.17                                     |
| <b>32-OBLC<sub>5</sub>-b-PZLL<sub>40</sub></b>  | 346 kDa            | 366 kDa               | 1.11                                     |
| <b>64-OBLC<sub>5</sub>-b-PZLL<sub>40</sub></b>  | 714 kDa            | 733 kDa               | 1.13                                     |
| <b>64-PZLL<sub>40</sub></b>                     | 640 kDa            | 671 kDa               | 1.13                                     |
| <b>1-PBLC<sub>50</sub>-b-PZLL<sub>400</sub></b> | 103 kDa            | 114 kDa               | 1.32                                     |

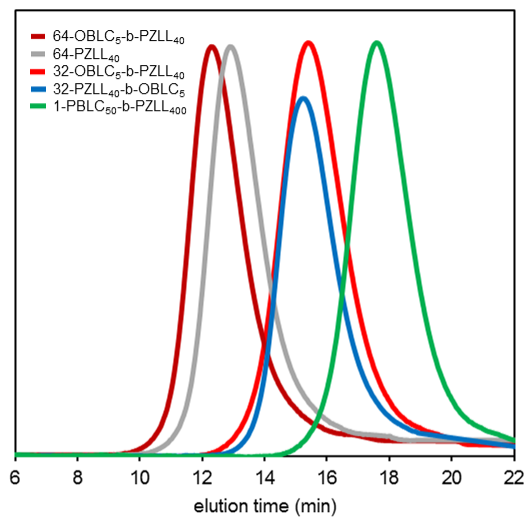

**Fig. S1.** SEC traces of homopolyptide and copolypeptides.

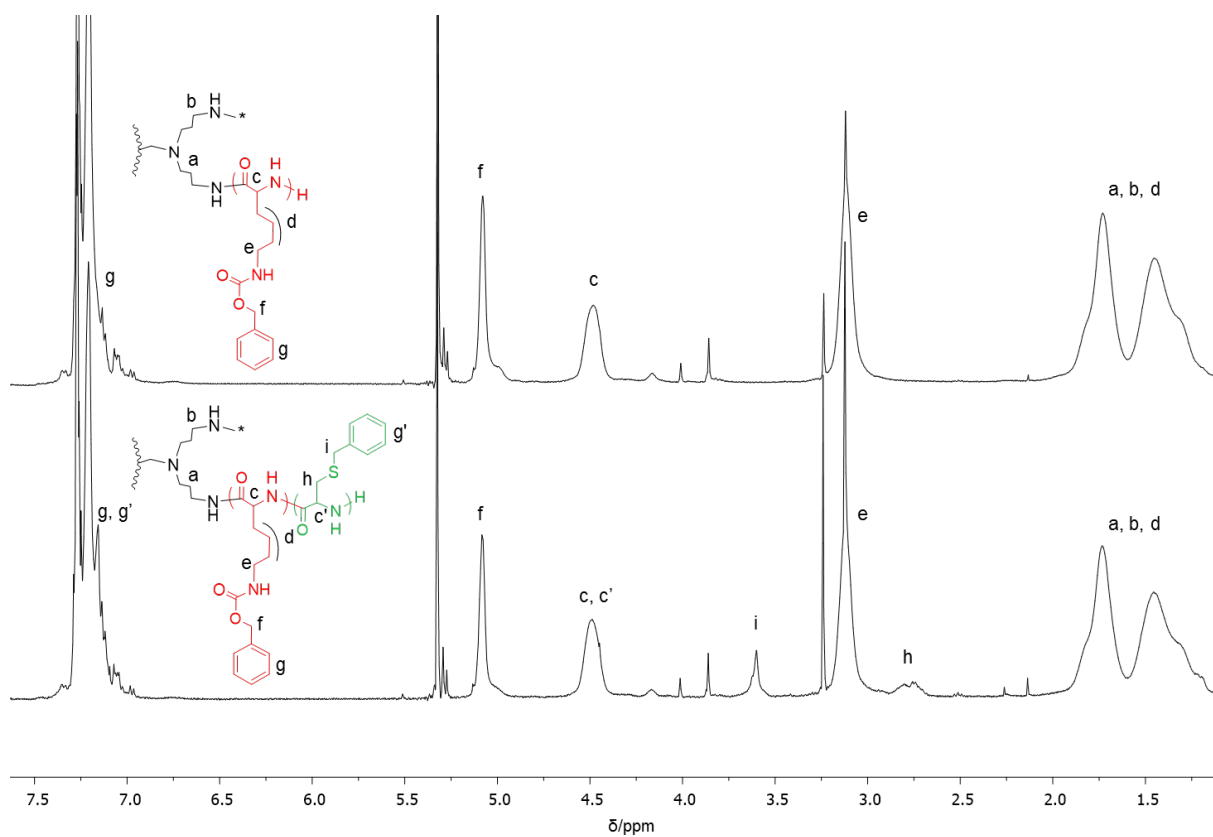

**Fig. S2.**  $^1\text{H-NMR}$  spectra of 32-PZLL<sub>40</sub> and 32-PZLL<sub>40</sub>-b-OBLC<sub>5</sub> in TFA-d.

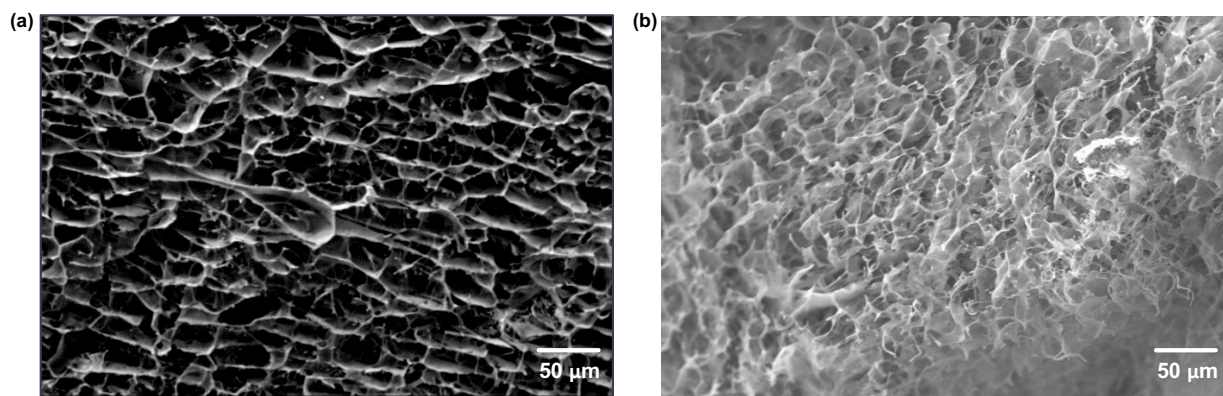

**Fig. S3.** Scanning electron microscope (SEM) micrograph from cross section of (a) 32-OLC<sub>5</sub>-b-PLL<sub>40</sub> hydrogel and (b) 32-PLL<sub>40</sub>-b-OLC<sub>5</sub>

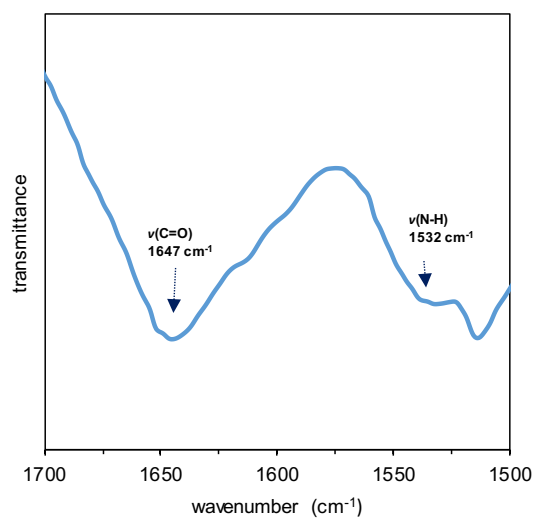

**Fig. S4.** FT-IR spectra of lyophilised 64-PLL<sub>40</sub> star polypeptide.

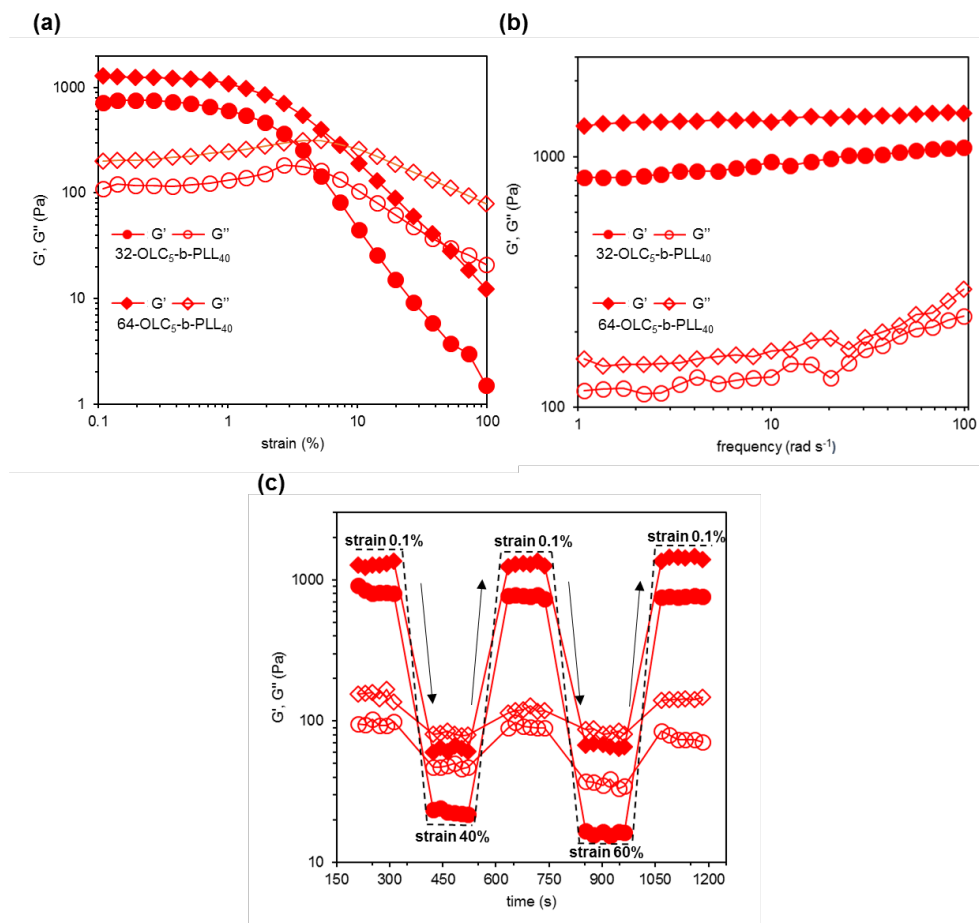

**Fig. S5.** Rheological properties of 64 and 32 arm core crosslinked copolypeptides hydrogels. Amplitude sweep (a) of core disulphide crosslinked star copolypeptides hydrogels with storage and loss modulus as a function of increasing strain and constant frequency (sheared at  $\gamma = 0.1\text{--}100$ ,  $\omega = 1 \text{ rad s}^{-1}$ ). Frequency sweep (b) of core disulphide crosslinked star copolypeptides hydrogels with storage and loss modulus as a function of increasing angular frequency and constant strain (sheared at  $\gamma = 0.1$ ,  $\omega = 1\text{--}100 \text{ rad s}^{-1}$ ). Stepping strain sweep (c) of core disulphide crosslinked star copolypeptides (at constant frequency  $\omega = 1 \text{ rad s}^{-1}$ ).
